# Supplementary material for: Polymer brushes in restricted geometries
Source: Royal Society of Chemistry journal article supplement (doi:10.1039/c0sm00444h), 2010-01-01
Supplement: c0sm00444h.pdf [file c0sm00444h.pdf]

**Supplementary Data**

**Table S1: Single Surface Fitting Parameters**

| Solvent   | dPS<br>T (Å) | dPS<br>SLD | P2VP<br>T (Å) | P2VP       |       | Q     |     | Roughness<br>(Å) |    |      |
|-----------|--------------|------------|---------------|------------|-------|-------|-----|------------------|----|------|
|           |              |            |               | SLD        | SLD   | SLD   | SLD | PS               | Q- | P2VP |
| Air       | 131          | 6.5        | 145           | 1.8        | 4.2   | 4.2   | 2.6 | 11               | 5  | 3    |
| h-Toluene | $h_1$ (Å)    | $SLD(0)$   | $SLD(h_1)$    | $SLD(t_2)$ | $n_1$ | $n_2$ |     |                  |    |      |
| Small     | 570          | 2.5        | 1.5           | 0.9        | 2     | 2     | 1.6 | 28               | 5  |      |

**Table S2: Opposing Symmetric Polymer Brush Fitting Parameters**

| Solvent   | D(Å)      | dPS       |          | P2VP       |            | SiO <sub>2</sub> |       | SiO <sub>2</sub> |      | SiO <sub>2</sub> |                  | Roughness (Å)          |         |      |     |     |
|-----------|-----------|-----------|----------|------------|------------|------------------|-------|------------------|------|------------------|------------------|------------------------|---------|------|-----|-----|
|           |           | T(Å)      | SLD      | T(Å)       | SLD        | T(Å)             | SLD   | T(Å)             | SLD  | PS               | SiO <sub>2</sub> | SiO <sub>2</sub> -P2VP | P2VP-PS |      |     |     |
| Air       | 1110      | 120       | 6.4      | 130        | 1.90       | 2.10             | 10    | 3.50             | 5.65 | 2.4              | 65               | 15                     | 4       | 2    | 4   | 2.5 |
| h-Toluene | $h_1$ (Å) | $h_2$ (Å) | $SLD(0)$ | $SLD(h_1)$ | $SLD(h_2)$ | $n_1$            | $n_2$ |                  |      |                  |                  |                        |         |      |     |     |
| Small     | 933       | 329       | 430      | 2.88       | 2.16       | 1.7              | 2.7   | 2.0              | 120  | 1.60             | 2.10             | 15                     | 3.51    | 5.76 | 2.1 | 45  |
| Medium    | 969       | 329       | 430      | 2.81       | 1.99       | 1.7              | 2.5   | 2.0              | 120  | 1.60             | 2.10             | 13                     | 3.54    | 5.68 | 2.4 | 45  |
| Large     | 1000      | 330       | 480      | 2.74       | 1.86       | 1.6              | 2.4   | 2.3              | 120  | 1.60             | 2.10             | 14                     | 3.54    | 5.69 | 2.5 | 45  |

**Table S3: Opposing Asymmetric Polymer Brush Fitting Parameters**

| Solvent   | T(Å)      | dPS       |          | P2VP <sub>1</sub> |            | P2VP <sub>2</sub> |       | SiO <sub>2</sub> |      | SiO <sub>2</sub> |      | Roughness (Å)          |                                   |        |    |    |   |   |   |
|-----------|-----------|-----------|----------|-------------------|------------|-------------------|-------|------------------|------|------------------|------|------------------------|-----------------------------------|--------|----|----|---|---|---|
|           |           | SLD       | SLD      | T(Å)              | SLD        | T(Å)              | SLD   | T(Å)             | SLD  | SLD              | dPS  | P2VP <sub>1</sub> -hPS | P2VP <sub>2</sub> -S <sub>2</sub> | PS-Air |    |    |   |   |   |
| Air       | 120       | 6.4       | 6.4      | 130               | 1.90       | 130               | 1.90  | 10               | 5.70 | 5.60             | 2.3  | 80                     | 15                                | 15     | 2  | 2  | 4 |   |   |
| h-Toluene | $h_1$ (Å) | $h_2$ (Å) | $SLD(0)$ | $SLD(h_1)$        | $SLD(h_2)$ | $n_1$             | $n_2$ |                  |      |                  |      |                        |                                   |        |    |    |   |   |   |
| Small     | 430       | 250       | 3.07     | 2.1               | 1.25       | 1.7               | 1.5   | 90               | 1.82 | 100              | 1.95 | 5.80                   | 5.70                              | 2.4    | 80 | 28 | 7 | 1 | 1 |
| Medium    | 430       | 360       | 2.90     | 2.1               | 1.25       | 1.8               | 1.9   | 95               | 1.85 | 105              | 1.95 | 5.80                   | 5.70                              | 2.0    | 80 | 30 | 5 | 2 | 2 |
| Large     | 525       | 400       | 2.83     | 1.8               | 1.25       | 1.5               | 1.7   | 90               | 1.80 | 107              | 1.95 | 5.80                   | 5.70                              | 3.4    | 80 | 30 | 1 | 3 | 2 |
